# Supplementary material for: Automatic Cardiopulmonary Endurance Assessment: A Machine Learning Approach Based on GA-XGBOOST
Source: MDPI journal article supplement (doi:10.3390/diagnostics12102538), 2022-10-19

## 1. C-OWA(MATLAB)

```
1. clc
2. clear
3. close all
4. x=[9 8 8 8 9
5.     9 7 8 7 8
6.     8 7 7 7 7
7.     8 8 8 7 8
8.     8 6 7 6 8
9.     9 7 8 6 8
10.    8 7 7 6 8
11.    8 6 7 6 7
12.    ]; %cardiovascular capacity
13.%row heading is the expert number, and the column heading is the
    indicator name
14.x=sort(x,'descend'); %descending order
15.[m,n]=size(x);
16.for i=1:m
17.    c(i)=nchoosek(m-1,i-1); %calculate number of combinations
18.end
19.a=c' ./ (2^(m-1)) ; %weight vector
20.
21.for j=1:n
22.    wj(:,j)=a.*x(:,j); %absolute weight
23.end
24.wj=sum(wj);
25.w=wj./sum(wj) %relative weight
26.%result
27.
28.% x=[8 8 7 8
29.%     8 7 6 7
30.%     9 9 8 9
31.%     8 8 7 8
32.%     8 7 7 8
33.%     9 8 7 8
34.%     8 8 7 8
35.%     8 6 5 7
36.%     ]; %Respiratory exchange capacity
37.% x=[8 9 6 7 8
38.%     9 9 6 6 8
39.%     8 9 6 7 8
40.%     8 8 7 7 7
41.%     9 9 6 8 8
```

```

42.%      8 9 7 7 8
43.%      7 9 6 7 7

%      8 9 7 7 7] %metabolic ability

w =

      0.2213      0.1883      0.2017      0.1750      0.2137

fx >>

```

## 2. THE ENTROPY WEIGHT METHOD (MATLAB)

```

1. data=xlsread('D:\Desktop\shangquan.xlsx')
2. data=data(:,3:end) %Only the indicator data is taken
3. data1=data;
4. index=[3,4];
5. for i=1:length(index)
6.     data1(:,index(i))=max(data(:,index(i)))-data(:,index(i));
7. end
8. index=[5];
9. a=90;
10. for i=1:length(index)
11.     data1(:,index(i))=1-abs(data(:,index(i))-a)/max(abs(data(:,index(i))-a))
12. end
13. data2=mapminmax(data1',0.001,1)
14. data2=data2';
15. [m,n]=size(data2);
16. p=zeros(m,n);
17. for j=1:n
18.     p(:,j)=data2(:,j)/sum(data2(:,j))
19. end
20. for j=1:n
21.     E(j)=-1/log(m)*sum(p(:,j).*log(p(:,j)))
22. end
23. %calculate weight
24. w=(1-E)/sum(1-E)

```

```

w1 =
0.0730 0.0620 0.0660 0.0580 0.0700 0.0820 0.0790 0.0710 0.0810 0.0760 0.0850 0.0590 0.0660 0.0730

w2 =
0.0840 0.0500 0.0820 0.0350 0.0820 0.1140 0.0440 0.0800 0.0940 0.0490 0.1460 0.0440 0.0380 0.0560

w =
0.0780 0.0580 0.0730 0.0480 0.0750 0.0960 0.0640 0.0750 0.0870 0.0640 0.1110 0.0530 0.0540 0.0660

```

### 3. CPETASSESSMENT(PYTHON)

```

1. def CPETAAssessment(Data):
2.     import pandas as pd
3.     import numpy as np
4.     import math
5.     from scipy import stats
6.     Parameters = Data.values.tolist()
7.     Parameters = np.array(Parameters)
8.     # data format conversion
9.     # Power=Parameters[:,1].astype('float32')
10.    Power = Parameters[:, 2].astype('float32')
11.    HR = Parameters[:, 3].astype('float32')
12.    SV = Parameters[:, 4].astype('float32')
13.    CO = Parameters[:, 5].astype('float32')
14.    V02 = Parameters[:, 6].astype('float32')
15.    VC02 = Parameters[:, 7].astype('float32')
16.    VE = Parameters[:, 8].astype('float32')
17.    BOA = Parameters[:, 9].astype('float32')
18.
19.    # ventilation equivalent
20.    EQ02 = VE * 1000. / V02
21.    EQ02 = np.array(EQ02) # print(EQ02.shape)
22.    EQC02 = VE * 1000. / VC02
23.    EQC02 = np.array(EQC02)
24.    # oxygen pulse
25.    OP = V02 / HR
26.    # RQ
27.    RQ = VC02 / V02
28.    # Ca_v02
29.    Ca_v02 = V02 / (HR * SV)
30.
31.    # new array
32.    parameters = np.vstack((Parameters[:, 1], Power, HR, SV, CO,
                             V02, VC02, VE, EQ02, EQC02, OP, RQ, Ca_v02, BOA))

```

```

33.     parameters = np.transpose(parameters)
34.     np.savetxt("parameters.csv", parameters, delimiter=',', fmt='%s')
35.
36.     ##拐点检测 AT 和力竭时间点
37.     # anaerobic threshold
38.     rows = len(Parameters)
39.
40.     for i in range(0, rows - 1):
41.         if (VO2[i] < VC02[i] and VO2[i + 1] < VC02[i + 1]):
42.             time_AT = Parameters[i, 1]
43.             print('AT 的时间为%s' % time_AT)
44.             AT = i
45.             break
46.     # exhaustion time point
47.     for i in range(0, rows - 1):
48.         if (Power[i + 1] < Power[i]):
49.             time_MAX = Parameters[i, 1]
50.             print('力竭的时间为%s' % time_MAX)
51.             MAX = i
52.             break
53.
54.     # Physiological characteristic parameters
55.
56.     x1 = HR[AT]
57.     HR_AT=HR[AT]
58.     x1_max = 173
59.     x1_min = 71
60.     # x1=(HR[AT]-x1_min)/(x1_max-x1_min)
61.     x2 = HR[MAX]
62.     x2_max = 198
63.     x2_min = 115
64.     # x2=(HR[MAX]-x2_min)/(x2_max-x2_min)
65.     x3 = SV[AT]
66.     x3_max = 132
67.     x3_min = 8.8
68.     # x3=(SV[AT]-x3_min)/(x3_max-x3_min)
69.     x4 = SV[MAX]
70.     x4_max = 192.1
71.     x4_min = 12.1
72.     # x4=(SV[MAX]-x4_min)/(x4_max-x4_min)
73.     x6 = OP[MAX]
74.     x6_max = 22.6

```

```

75.     x6_min = 6.8
76.     # x6=(OP[MAX]-x6_min)/(x6_max-x6_min)
77.     # Gas exchange function
78.     x7 = EQO2[AT]
79.     x7_max = 33.1
80.     x7_min = 20.2
81.     # x7=(x7_max-EQO2[AT])/(x7_max-x7_min)
82.     x8 = EQO2[MAX]
83.     x8_max = 72.3
84.     x8_min = 22.5
85.     # x8=(x8_max-EQO2[MAX])/(x8_max-x8_min)
86.     x9 = VE[AT]
87.     x9_max = 82.8
88.     x9_min = 18.3
89.     # x9=(VE[AT]-x9_min)/(x9_max-x9_min)
90.     x10 = VE[MAX]
91.     x10_max = 168.6
92.     x10_min = 28.4
93.     # x10=(VE[MAX]-x10_min)/(x10_max-x10_min)
94.     # Metabolic functions
95.     x11 = VO2[AT]
96.     x11_max = 39.4
97.     x11_min = 14.06
98.     # x11=(VO2[AT]-x11_min)/(x11_max-x11_min)
99.     x12 = VO2[MAX]
100.    x12_max = 61.02
101.    x12_min = 21.68
102.    # x12=(VO2[MAX]-x12_min)/(x12_max-x12_min)
103.    x14 = RQ[MAX]
104.    x14_max = 1.47
105.    x14_min = 0.97
106.    # x14=(RQ[MAX]-x14_min)/(x14_max-x14_min)
107.    x15 = Ca_vO2[AT]
108.    x15_max = 0.977
109.    x15_min = 0.105
110.    # x15=(Ca_vO2[AT]-x15_min)/(x15_max-x15_min)
111.    x16 = Ca_vO2[MAX]
112.    x16_max = 0.880
113.    x16_min = 0.0916
114.    # x16=(Ca_vO2[MAX]-x16_min)/(x16_max-x16_min)
115.
116.    # MroScore
117.    # Define positive and negative ideal solutions

```

```

118.     # Define the initial evaluation matrix
119.     matrix = np.zeros((3, 14))
120.     matrix[0, :] = [x1, x2, x3, x4, x6, x7, x8, x9, x10, x11, x1
        2, x14, x15, x16]
121.     matrix[1, :] = [x1_max, x2_max, x3_max, x4_max, x6_max, x7_m
        ax, x8_max, x9_max, x10_max, x11_max, x12_max, x14_max,
122.                     x15_max, x16_max]
123.     matrix[2, :] = [x1_min, x2_min, x3_min, x4_min, x6_min, x7_m
        in, x8_min, x9_min, x10_min, x11_min, x12_min, x14_min,
124.                     x15_min, x16_min]
125.     # integer ideal solution
126.     D = np.zeros((2, 14))
127.     s1 = 0
128.     s2 = 0
129.     Weight = [0.078, 0.058, 0.073, 0.048, 0.075, 0.096, 0.064, 0
        .075, 0.087, 0.064, 0.111, 0.053, 0.054, 0.066]
130.     for i in range(0, 13):
131.         if (i != 7 and i != 8):
132.             D[0, i] = Weight[i] * ((matrix[0, i] - matrix[1, i])
        / (matrix[1, i] - matrix[2, i]))
133.             s1 = s1 + pow(D[0, i], 2)
134.         else:
135.             D[0, i] = Weight[i] * ((matrix[2, i] - matrix[0, i])
        / (matrix[1, i] - matrix[2, i]))
136.             s1 = s1 + pow(D[0, i], 2)
137.     s1 = math.sqrt(s1)
138.     for i in range(0, 13):
139.         if (i != 7 and i != 8):
140.             D[1, i] = Weight[i] * ((matrix[0, i] - matrix[2, i])
        / (matrix[1, i] - matrix[2, i]))
141.             s2 = s2 + pow(D[1, i], 2)
142.         else:
143.             D[1, i] = Weight[i] * ((matrix[1, i] - matrix[0, i])
        / (matrix[1, i] - matrix[2, i]))
144.             s2 = s2 + pow(D[1, i], 2)
145.     s2 = math.sqrt(s2)
146.     MroScore = 70.855 * s2 / (s1 + s2) + 46.615
147.     MroScore = round(MroScore, 1)
148.     print('心肺耐力综合得分为%10.1f' % MroScore)
149.
150.
151.     #cardiovascular capacity Score1
152.     Weight1 = [0.235, 0.175, 0.220, 0.144, 0.226]

```

```

153.     D = np.zeros((2, 5))
154.     s1 = 0
155.     s2 = 0
156.     for i in range(0, 4):
157.         D[0, i] = Weight[i] * ((matrix[0, i] - matrix[1, i]) / (
            matrix[1, i] - matrix[2, i]))
158.         s1 = s1 + pow(D[0, i], 2)
159.     s1 = math.sqrt(s1)
160.     for i in range(0, 5):
161.         D[1, i] = Weight[i] * ((matrix[0, i] - matrix[2, i]) / (
            matrix[1, i] - matrix[2, i]))
162.         s2 = s2 + pow(D[1, i], 2)
163.     s2 = math.sqrt(s2)
164.     Score1 = 70.855 * s2 / (s1 + s2) + 40.615
165.     print(s2 / (s1 + s2) )
166.     Score1 = round(Score1, 1)
167.     print('心血管能力得分为%10.1f' % Score1)
168.
169.     # 呼吸能力 Score2
170.     Weight1 = [0.298, 0.198, 0.223, 0.270]
171.     D = np.zeros((2, 4))
172.     s1 = 0
173.     s2 = 0
174.     for i in range(0, 3):
175.         D[0, i] = Weight[i] * ((matrix[0, i + 5] - matrix[1, i +
            5]) / (matrix[1, i + 5] - matrix[2, i + 5]))
176.         s1 = s1 + pow(D[0, i], 2)
177.     s1 = math.sqrt(s1)
178.     for i in range(0, 4):
179.         D[1, i] = Weight[i] * ((matrix[0, i + 5] - matrix[2, i +
            5]) / (matrix[1, i + 5] - matrix[2, i + 5]))
180.         s2 = s2 + pow(D[1, i], 2)
181.     s2 = math.sqrt(s2)
182.     Score2 = 69.855 * s2 / (s1 + s2) + 48.615
183.     Score2 = round(Score2, 1)
184.     print('呼吸能力得分为%10.1f' % Score2)
185.
186.     # metabolic capacity Score3
187.     Weight1 = [0.184, 0.319, 0.152, 0.155, 0.190]
188.     D = np.zeros((2, 5))
189.     s1 = 0
190.     s2 = 0
191.     for i in range(0, 4):
192.         D[0, i] = Weight[i] * ((matrix[0, i + 9] - matrix[1, i +

```

```

    9)) / (matrix[1, i + 9] - matrix[2, i + 9]))
193.     s1 = s1 + pow(D[0, i], 2)
194.     s1 = math.sqrt(s1)
195.     for i in range(0, 5):
196.         D[1, i] = Weight[i] * ((matrix[0, i + 9] - matrix[2, i +
    9)) / (matrix[1, i + 9] - matrix[2, i + 9]))
197.         s2 = s2 + pow(D[1, i], 2)
198.     s2 = math.sqrt(s2)
199.     Score3 = 70.855 * s2 / (s1 + s2) + 44.615
200.     Score3 = round(Score3, 1)
201.     print('代谢能力得分为%10.1f' % Score3)
202.     result=[time_AT,time_MAX,MroScore,Score1,Score2,Score3,HR_AT
    ]
203.     return result

1.
    import pandas as pd
2. import CPETAssessment
3. Data = pd.read_csv(r'D:\Users\LiuQi\Desktop\data_lq.csv')
4. result=CPETAssessment.CPETAssessment(Data)
5. print(result)

```

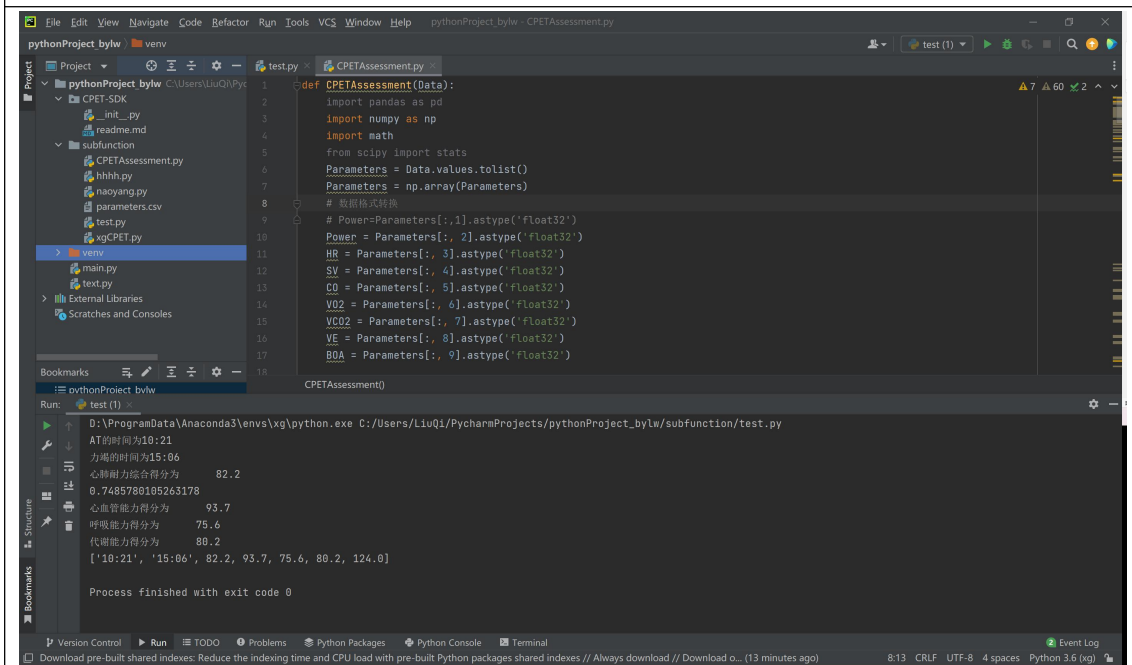

```

pythonProject_bylw - venv
Project
  pythonProject_bylw
    CPET-SDK
      __init__.py
      README.md
      subfunction
        CPETAssessment.py
        hhhh.py
        naoyang.py
        parameters.csv
        test.py
        xgCPET.py
    venv
      main.py
      text.py
    External Libraries
    Scratches and Consoles
Bookmarks
Run: test (1)
D:\ProgramData\Anaconda3\envs\xg\python.exe C:/Users/LiuQi/PycharmProjects/pythonProject_bylw/subfunction/test.py
AT的时间为10:21
力竭的时间为15:06
心肺耐力综合得分为 82.2
0.7485780105263178
心血管能力得分为 93.7
呼吸能力得分为 75.6
代谢能力得分为 80.2
['10:21', '15:06', 82.2, 93.7, 75.6, 80.2, 124.0]
Process finished with exit code 0

```

#### 4. GA\_XGBOOST(PYTHON)

```
1. # coding=utf-8
```



```

2. from __future__ import division
3. import numpy as np
4. import pandas as pd
5. import random
6. import math
7. from sklearn import metrics
8. from sklearn.model_selection import train_test_split
9. import xgboost as xgb
10. from random import randint
11.
12. # from xgboost.sklearn import XGBClassifiers
13.
14. # generations = 400    # Generations 100
15. pop_size = 500    # Population quantity 500
16. # max_value = 10      # The maximum value allowed in a gene (to
    # prevent the number of discrete variables from reaching a power of two,
    # limit the maximum value, not used here)
17. chrom_length = 15    # Length of chromosome
18. pc = 0.6    # Crossover probability
19. pm = 0.01    # Mutation probability
20. results = []    # Optimal solution (auc 最高
    # 值, n_estimators, max_depth)
21. fit_value = []    # 个体适应度
22. fit_mean = []    # 平均适应度
23. # pop = [[0, 1, 0, 0, 0, 1, 0, 1, 0, 1, 0, 1, 0, 1, 0] for i in r
    # ange(pop_size)] # Initializes the initial sequence of genes of all
    # individuals in the population
24.
25. random_seed = 20
26. cons_value = 0.19 / 31    # (0.20-0.01) / (32 - 1)
27.
28. '''The parameters to debug are: (Reference:
    # http://xgboost.readthedocs.io/en/latest/parameter.html)
29.     tree_num: Number of base trees    ----- (parameters to
    # debug)
30.     eta: learning_rate, default value 0.3, range of
    # [0,1]    ----- (parameters to debug)
31.     max_depth: default value 6    ----- (parameters to
    # debug)
32.
33.     Three of the above parameters should be adjusted, and the rest can
    # be adjusted by ideal values
34. '''

```

```

35.
36.
37. def xgboostModel(tree_num, eta, max_depth, random_seed):
38.     train_xy = loadFile("../Data/train-gao.csv")
39.     train_xy = train_xy.drop('ID', axis=1) # Delete the ID of the
        training set
40.     # Divide the training set into a ratio of 8:2 (training set to
        validation set ratio)
41.     train, val = train_test_split(
42.         train_xy, test_size=0.2, random_state=80)
43.
44.     train_y = train.Kind
45.     train_x = train.drop('Kind', axis=1)
46.     dtrain = xgb.DMatrix(train_x, label=train_y)
47.
48.     val_y = val.Kind
49.     val_x = val.drop('Kind', axis=1)
50.     dval = xgb.DMatrix(val_x)
51.
52.     params = {
53.         'booster': 'gbtree', # gbtree used
54.         'objective': 'binary:logistic',
55.         'early_stopping_rounds': 100,
56.         # 'scale_pos_weight': 0.13, # Positive sample weight
57.         'eval_metric': 'auc',
58.         'eta': eta, # 0.02
59.         'max_depth': max_depth, # 8
60.         'gamma': 0.1,
61.         'subsample': 0.8,
62.         'colsample_bytree': 0.8,
63.         'lambda': 550,
64.         'alpha': 19,
65.         'seed': randint(1, 10000),
66.         'nthread': 3,
67.         'silent': 1
68.     }
69.     model = xgb.train(params, dtrain, num_boost_round=tree_num)
70.     predict_y = model.predict(dval, ntree_limit=model.best_ntree_
        limit)
71.     roc_auc = metrics.roc_auc_score(val_y, predict_y)
72.     return roc_auc
73.
74.

```

```

75. def loadFile(filePath):
76.     fileData = pd.read_csv(filePath)
77.     return fileData
78.
79.
80. # Step 1 : Encode the parameters (used to initialize the gene
    sequence, can be selected to initialize the gene sequence, omitted
    in this function)
81. def geneEncoding(pop_size, chrom_length):
82.     pop = [[]]
83.     for i in range(pop_size):
84.         temp = []
85.         for j in range(chrom_length):
86.             temp.append(random.randint(0, 1))
87.         pop.append(temp)
88.     return pop[1:]
89.
90.
91. # Step 2 : Calculate the individual objective function value
92. def cal_obj_value(pop):
93.     objvalue = []
94.     variable = decodechrom(pop)
95.     for i in range(len(variable)):
96.         tempVar = variable[i]
97.
98.         tree_num_value = (tempVar[0] + 1) * 10
99.         eta_value = 0.01 + tempVar[1] * cons_value
100.        max_depth_value = 3 + tempVar[2]
101.        min_child_weight_value = 1 + tempVar[3]
102.
103.        aucValue = xgboostModel(tree_num_value, eta_value, max_d
            epth_value, random_seed)
104.        objvalue.append(aucValue)
105.    return objvalue # Objective function value
    objvalue[m] corresponds to Individual genes pop[m]
106.
107.
108. # Decode each individual and split into individual variables,
    return tree_num (4) 、 eta (5) 、 max_depth (3)
109. def decodechrom(pop):
110.     variable = []
111.     for i in range(len(pop)):
112.         res = []

```

```

113.
114.     # Calculate the first variable value, 0101->10(reverse)
115.     temp1 = pop[i][0:4]
116.     v1 = 0
117.     for i1 in range(4):
118.         v1 += temp1[i1] * (math.pow(2, i1))
119.     res.append(int(v1))
120.
121.     # Calculate the second variable value
122.     temp2 = pop[i][4:9]
123.     v2 = 0
124.     for i2 in range(5):
125.         v2 += temp2[i2] * (math.pow(2, i2))
126.     res.append(int(v2))
127.
128.     # Calculate the third variable value
129.     temp3 = pop[i][9:12]
130.     v3 = 0
131.     for i3 in range(3):
132.         v3 += temp3[i3] * (math.pow(2, i3))
133.     res.append(int(v3))
134.
135.     variable.append(res)
136.     return variable
137.
138.
139. # Step 3: Calculate individual fitness value (calculate maximum
    value, eliminate negative value)
140. def calfitvalue(obj_value):
141.     fit_value = []
142.     temp = 0.0
143.     Cmin = 0
144.     for i in range(len(obj_value)):
145.         if (obj_value[i] + Cmin > 0):
146.             temp = Cmin + obj_value[i]
147.         else:
148.             temp = 0.0
149.         fit_value.append(temp)
150.     return fit_value
151.
152.
153. # Step 4: Find the maximum value of the fitness function, and the
    corresponding individual

```

```

154. def best(pop, fit_value):
155.     best_individual = pop[0]
156.     best_fit = fit_value[0]
157.     for i in range(1, len(pop)):
158.         if (fit_value[i] > best_fit):
159.             best_fit = fit_value[i]
160.             best_individual = pop[i]
161.     return [best_individual, best_fit]
162.
163.
164. # Step 5: Each time evolve, record the best results (convert binary
    to decimal)
165. def b2d(best_individual):
166.     # Calculate the first variable value
167.     temp1 = best_individual[0:4]
168.     v1 = 0
169.     for i1 in range(4):
170.         v1 += temp1[i1] * (math.pow(2, i1))
171.     v1 = (v1 + 1) * 10
172.
173.     # Calculate the second variable value
174.     temp2 = best_individual[4:9]
175.     v2 = 0
176.     for i2 in range(5):
177.         v2 += temp2[i2] * (math.pow(2, i2))
178.     v2 = 0.01 + v2 * cons_value
179.
180.     # Calculate the third variable value
181.     temp3 = best_individual[9:12]
182.     v3 = 0
183.     for i3 in range(3):
184.         v3 += temp3[i3] * (math.pow(2, i3))
185.     v3 = 3 + v3
186.
187.     return int(v1), float(v2), int(v3)
188.
189. # Step 6: Natural selection (roulette algorithm)
190. def selection(pop, fit_value):
191.     # Calculate the probability of each adaptation value
192.     new_fit_value = []
193.     total_fit = sum(fit_value)
194.     for i in range(len(fit_value)):
195.         new_fit_value.append(fit_value[i] / total_fit)

```

```

196.     # The cumulative probability of each adaptation
197.     cumsum(new_fit_value)
198.     # Generate a sequence of random floating point numbers
199.     ms = []
200.     pop_len = len(pop)
201.     for i in range(pop_len):
202.         ms.append(random.random())
203.     # Sort the generated random sequence of floating point numbers
204.     ms.sort()
205.     # Roulette algorithm (the selected individual becomes the next
        round, the unselected individual is eliminated directly, and the
        selected individual is replaced)
206.     fitin = 0
207.     newin = 0
208.     newpop = pop
209.     while newin < pop_len:
210.         if (ms[newin] < new_fit_value[fitin]):
211.             newpop[newin] = pop[fitin]
212.             newin = newin + 1
213.         else:
214.             fitin = fitin + 1
215.     pop = newpop
216.
217.
218. # Sum up the fitness values
219. def sum(fit_value):
220.     total = 0
221.     for i in range(len(fit_value)):
222.         total += fit_value[i]
223.     return total
224.
225.
226. # Calculate cumulative probability
227. def cumsum(fit_value):
228.     temp = []
229.     for i in range(len(fit_value)):
230.         t = 0
231.         j = 0
232.         while (j <= i):
233.             t += fit_value[j]
234.             j = j + 1
235.         temp.append(t)
236.     for i in range(len(fit_value)):

```

```
237.         fit_value[i] = temp[i]
238.
239.
240. # Step 7: crossover
241. def crossover(pop, pc): # 个体间交叉，实现基因交换
242.     poplen = len(pop)
243.     for i in range(poplen - 1):
244.         if (random.random() < pc):
245.             cpoint = random.randint(0, len(pop[0]))
246.             temp1 = []
247.             temp2 = []
248.             temp1.extend(pop[i][0: cpoint])
249.             temp1.extend(pop[i + 1][cpoint: len(pop[i])])
250.             temp2.extend(pop[i + 1][0: cpoint])
251.             temp2.extend(pop[i][cpoint: len(pop[i])])
252.             pop[i] = temp1
253.             pop[i + 1] = temp2
254.
255.
256. # Step 8: genetic mutations
257. def mutation(pop, pm):
258.     px = len(pop)
259.     py = len(pop[0])
260.     for i in range(px):
261.         if (random.random() < pm):
262.             mpoint = random.randint(0, py - 1)
263.             if (pop[i][mpoint] == 1):
264.                 pop[i][mpoint] = 0
265.             else:
266.                 pop[i][mpoint] = 1
267.
268.
269. def writeToFile(var, w_path):
270.     f = file(w_path, "a+")
271.     for item in var:
272.         f.write(str(item) + "\r\n")
273.     f.close()
274.
275.
276. def generAlgo(generations):
277.     pop = geneEncoding(pop_size, chrom_length)
278.     for i in range(generations):
279.         # print("第 " + str(i) + " 代开始繁殖.....")
280.         obj_value = cal_obj_value(pop) # Calculate the objective
```

```

function value
281.     # print(obj_value)
282.     fit_value = calfitvalue(obj_value) # Calculate
        individual fitness value
283.     # print(fit_value)
284.     [best_individual, best_fit] = best(pop, fit_value) # Pick the best individual and the best value of the function
285.     # print("best_individual: " + str(best_individual))
286.     v1, v2, v3= b2d(best_individual)
287.     results.append([best_fit, v1, v2, v3]) # At each evolve, record the best results
288.     # print(str(best_individual) + " " + str(best_fit))
289.     selection(pop, fit_value) # Natural selection, weeding out some of the less fit individuals
290.     crossover(pop, pc) # crossover
291.     mutation(pop, pc) # genetic mutation
292.     # print(results)
293.     results.sort()
294.     # write results to file
295.     writeToFile(results, "generation_" + str(generations) + ".txt")
296.     print(results[-1])
297.     # print(xgboostModel(100, 12))
298.
299.
300. if __name__ == '__main__':
301.     gen = [100, 200, 300, 400, 500]
302.     for g in gen:
303.         generAlgo(int(g))

```



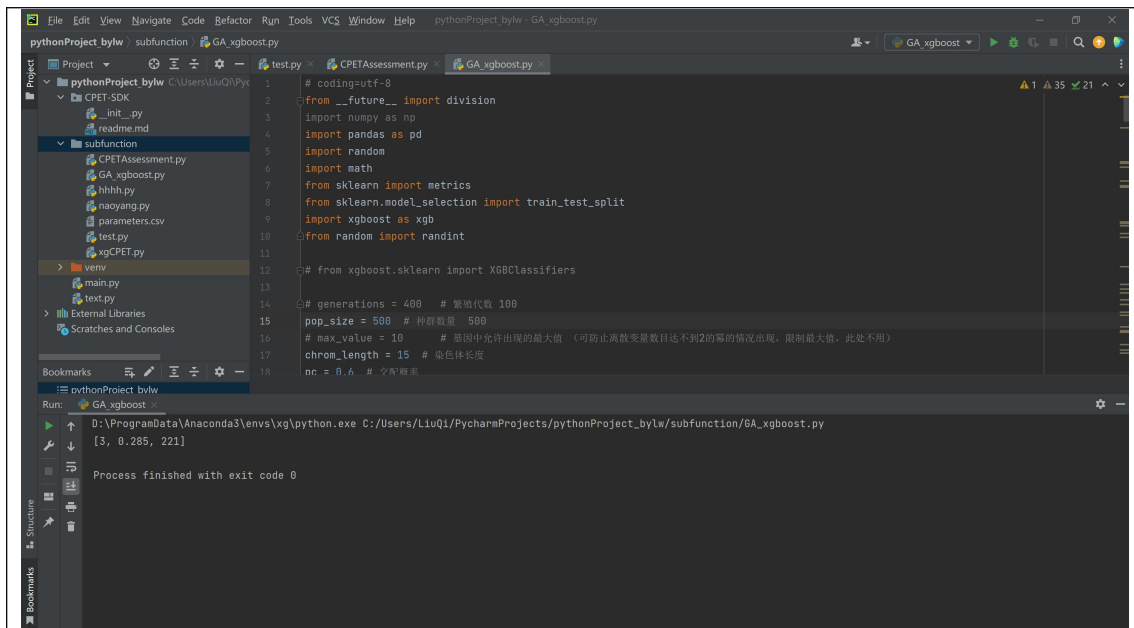

#### 4. XGBOOST\_SHAP(PYTHON)

```
1. import xgboost as xgb
2. import pandas as pd
3. import numpy as np
4. import matplotlib.pyplot as plt
5. import shap
6. from sklearn.model_selection import train_test_split
7. from sklearn.metrics import accuracy_score
8. from sklearn.metrics import confusion_matrix
9. from sklearn.metrics import classification_report
10. from sklearn.metrics import precision_recall_fscore_support
11. from sklearn.metrics import f1_score
12.
13. plt.style.use('seaborn')
14. data = pd.read_excel(r"D:\data.xlsx")
15. cols = ['x1', 'x2', 'x3', 'x4', 'x6', 'x7', 'x8', 'x9', 'x10', 'x11', 'x12', 'x14', 'x15', 'x16']
16. num = len(data)
17. X_train, X_test, y_train, y_test = train_test_split(data[cols], data['等级'], test_size=0.3, random_state=10)
18. model = xgb.XGBRegressor(max_depth=221, learning_rate=0.285, n_estimators=3)
19. model.fit(X_train, y_train)
20.
21. ## Interpretability analysis of the model
22. # get feature importance
23. plt.figure(figsize=(15, 5))
```

```

24.plt.bar(range(len(cols)), model.feature_importances_)
25.plt.xticks(range(len(cols)), cols, rotation=-45, fontsize=14)
26.plt.title('Feature importance', fontsize=14)
27.plt.show()
28.
29.explainer = shap.TreeExplainer(model)
30.shap_values = explainer.shap_values(X_train[cols])
31.shap.dependence_plot('x12',shap_values, X_train[cols]);
32.
33.
34.y_pred=model.predict(X_test)
35.predictions=[round(value) for value in y_pred]
36.
37.# Calculate confusion matrix
38.confusion_matrix(y_test,predictions)
39.
40.accuracy=accuracy_score(y_test,predictions)
41.# print('accu: %.2f%%' % (accuracy *100))
42.print(f1_score(y_test, predictions, average='macro'))

```

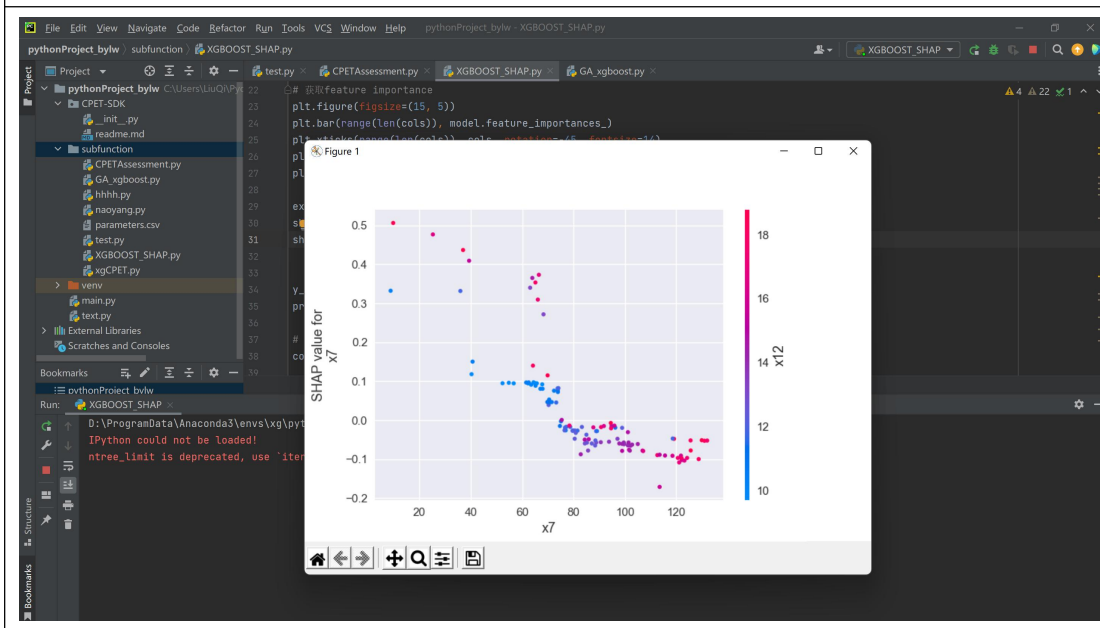

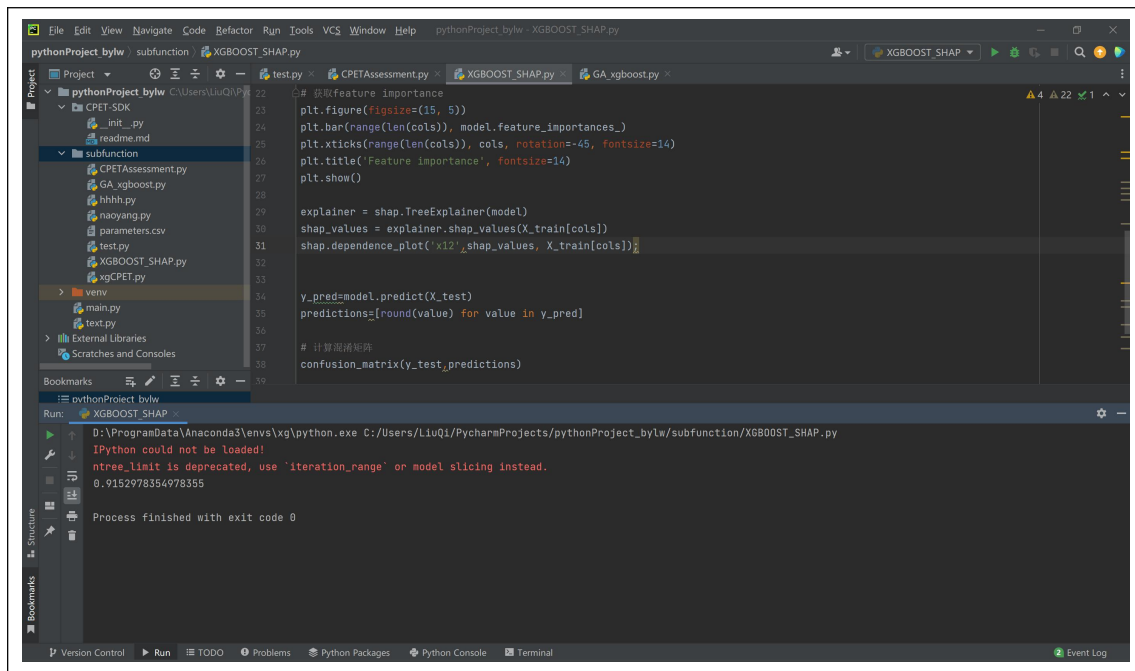

Supplement: s1 [file s1]
